WITHDRAWN ARTICLE

## WITHDRAWN: Lipid nanoparticles co-loaded with miRNA-22 and methotrexate for enhanced anti-inflammatory response in rheumatoid arthritis

Hao Yuan; Ya-Meng Peng; Zhen-Yi Long; Si-Xian Wu; Yi-Feng Zhou

*Biosci Rep* (2020) BSR20201735; **DOI:** 10.1042/BSR20201735

The Accepted Manuscript version of this article (published on 18 August 2020) was withdrawn on 3 December 2020 due to concerns over data validity.
